# Supplementary material
Source: MDPI journal article supplement (https://www.mdpi.com/2075-4701/10/7/976)
Supplement: s1 [file s1]

## Supplementary Figures

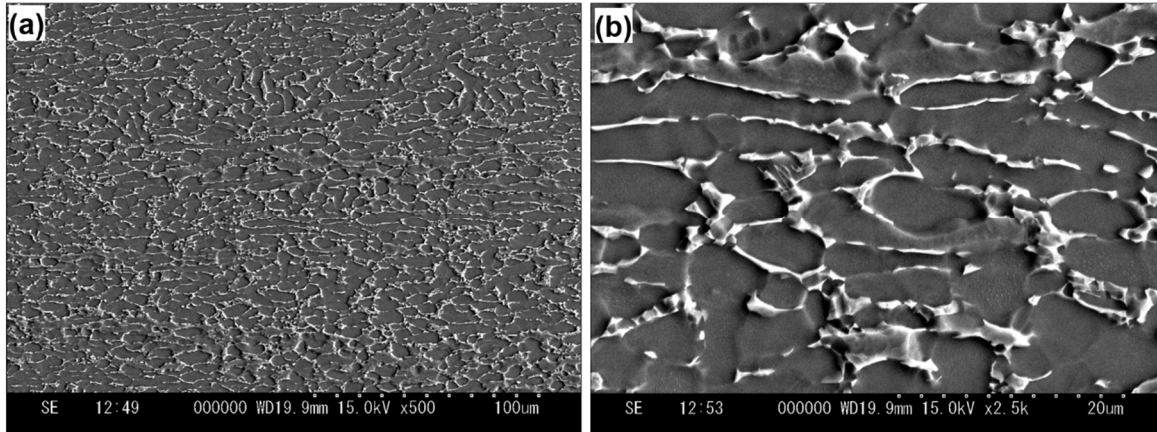

**Supplementary Figure S1.** SEM images of the microstructure of the base material at: (a) low magnification and (b) high magnification

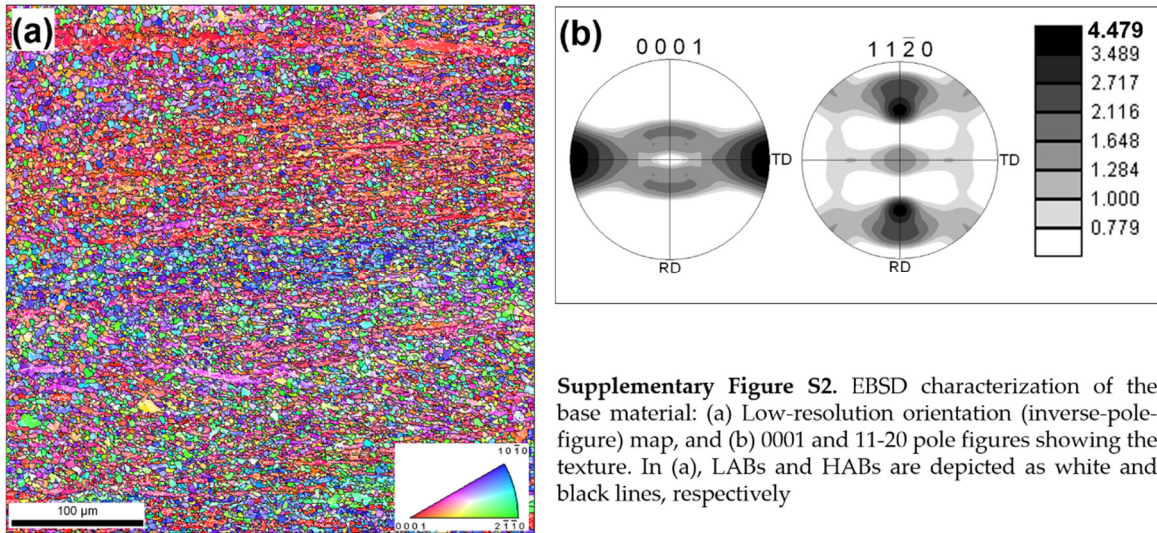

**Supplementary Figure S2.** EBSD characterization of the base material: (a) Low-resolution orientation (inverse-pole-figure) map, and (b) 0001 and 11-20 pole figures showing the texture. In (a), LABs and HABs are depicted as white and black lines, respectively

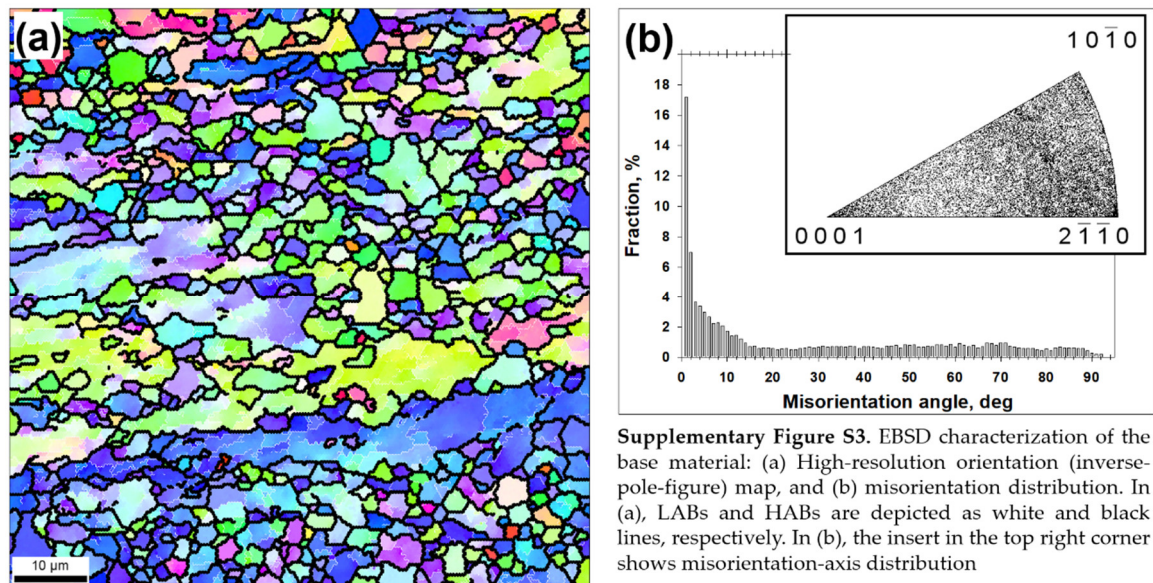

**Supplementary Figure S3.** EBSD characterization of the base material: (a) High-resolution orientation (inverse-pole-figure) map, and (b) misorientation distribution. In (a), LABs and HABs are depicted as white and black lines, respectively. In (b), the insert in the top right corner shows misorientation-axis distribution

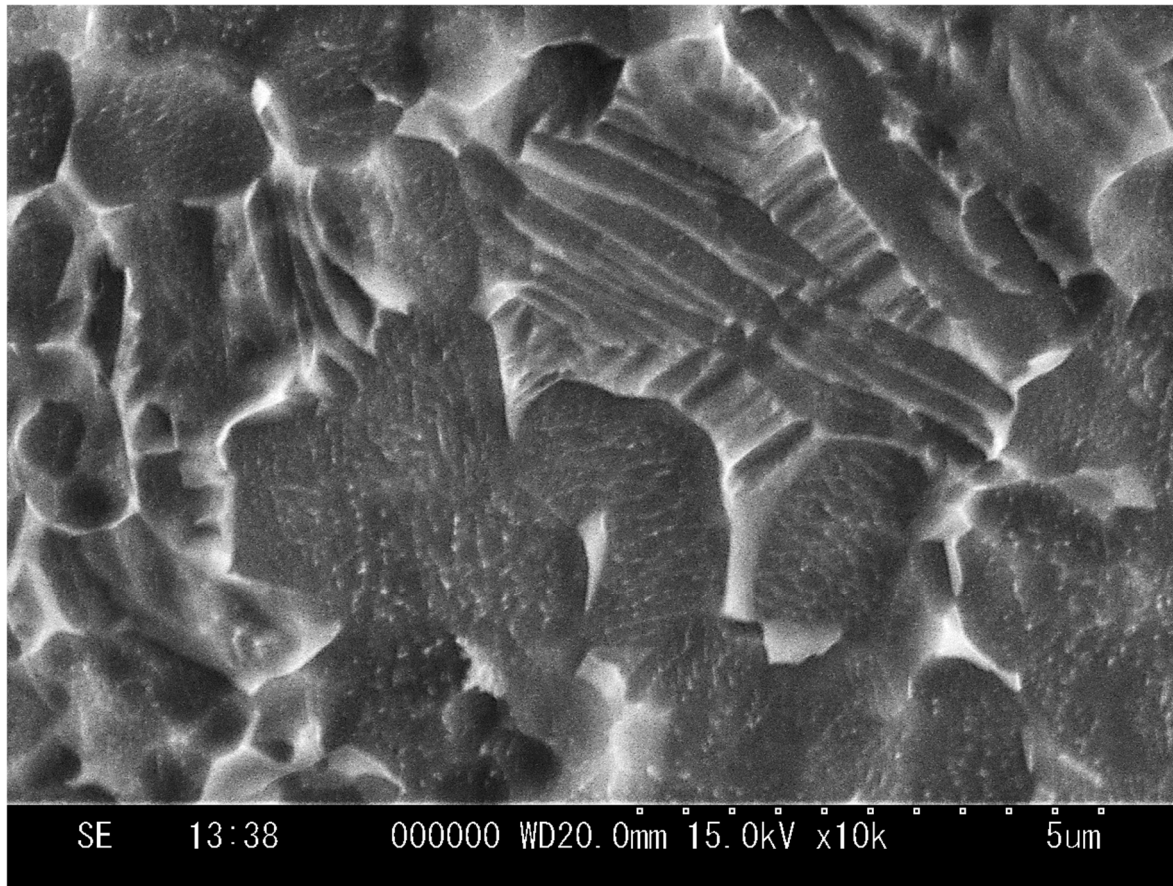

**Supplementary Figure S4.** SEM micrograph taken from the stir zone which exemplifies several secondary-alpha colonies within a prior- $\beta$  grain
